# Supplementary material for: In Vitro CRISPR/Cas9-Directed Gene Editing to Model LRRK2 G2019S Parkinson’s Disease in Common Marmosets
Source: Sci Rep. 2020 Feb 26;10:3447. doi: 10.1038/s41598-020-60273-2 (PMC7044232; doi:10.1038/s41598-020-60273-2)
Supplement: Supplementary file 1 — Supplemental Figures and Tables. [file 41598_2020_60273_MOESM1_ESM.pdf]

## **SUPPLEMENTAL FIGURES AND TABLES**

### ***In Vitro* CRISPR/Cas9-Directed Gene Editing to Model LRRK2 G2019S Parkinson's Disease in Common Marmosets**

Scott C. Vermilyea, Alexander Babinski, Nina Tran, Samantha To, Scott Guthrie, Jillian H. Kluss, Jenna Kropp Schmidt, Gregory J. Wiepz, Michael G. Meyer, Megan E. Murphy, Mark R. Cookson, Marina E. Emborg, Thaddeus G. Golos

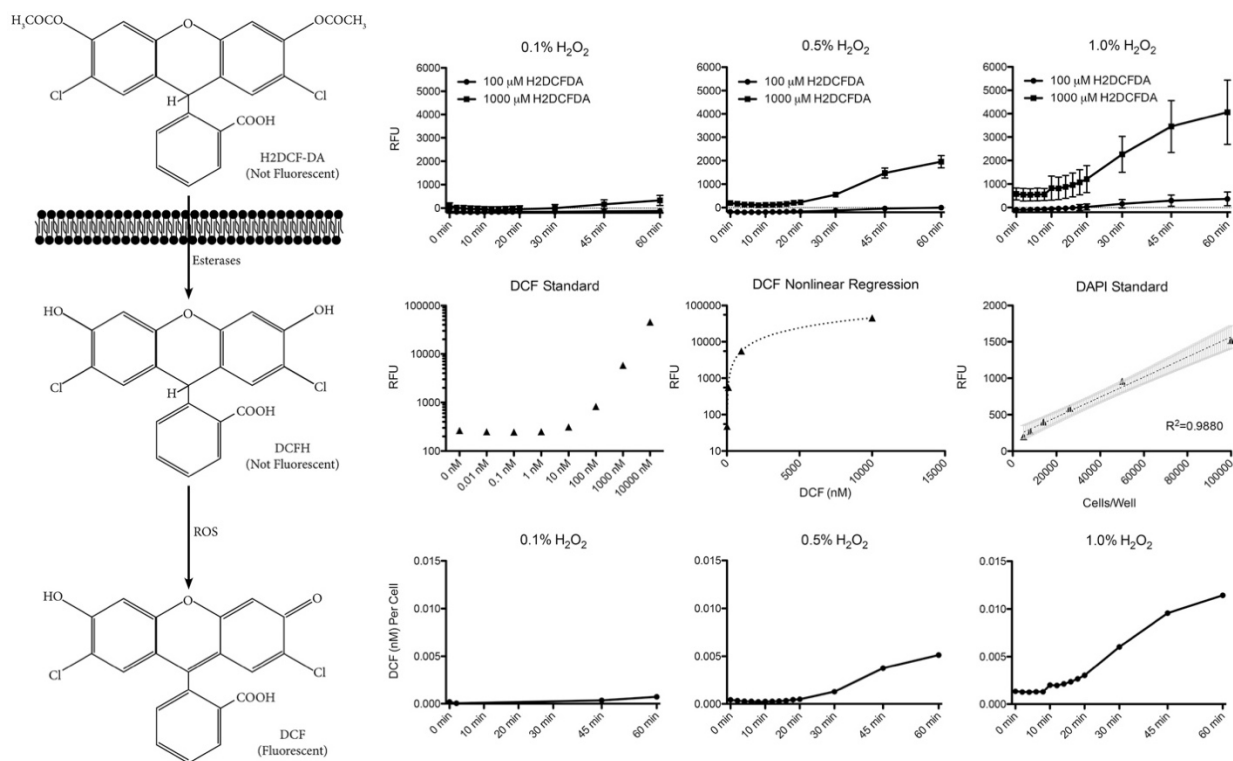

**Supplemental Figure 1: H2-DCFDA Optimization and Interpolation.** H2DCF-DA is a cell permeable compound that converts to a fluorescent reporter when exposed to ROS. H2DCFDA concentration and plating density variability was optimized for the neuronal culture. RFU was controlled through a DCF standard nonlinear regression as well as a DAPI standard linear regression to interpolate the concentration of DCF per cell.

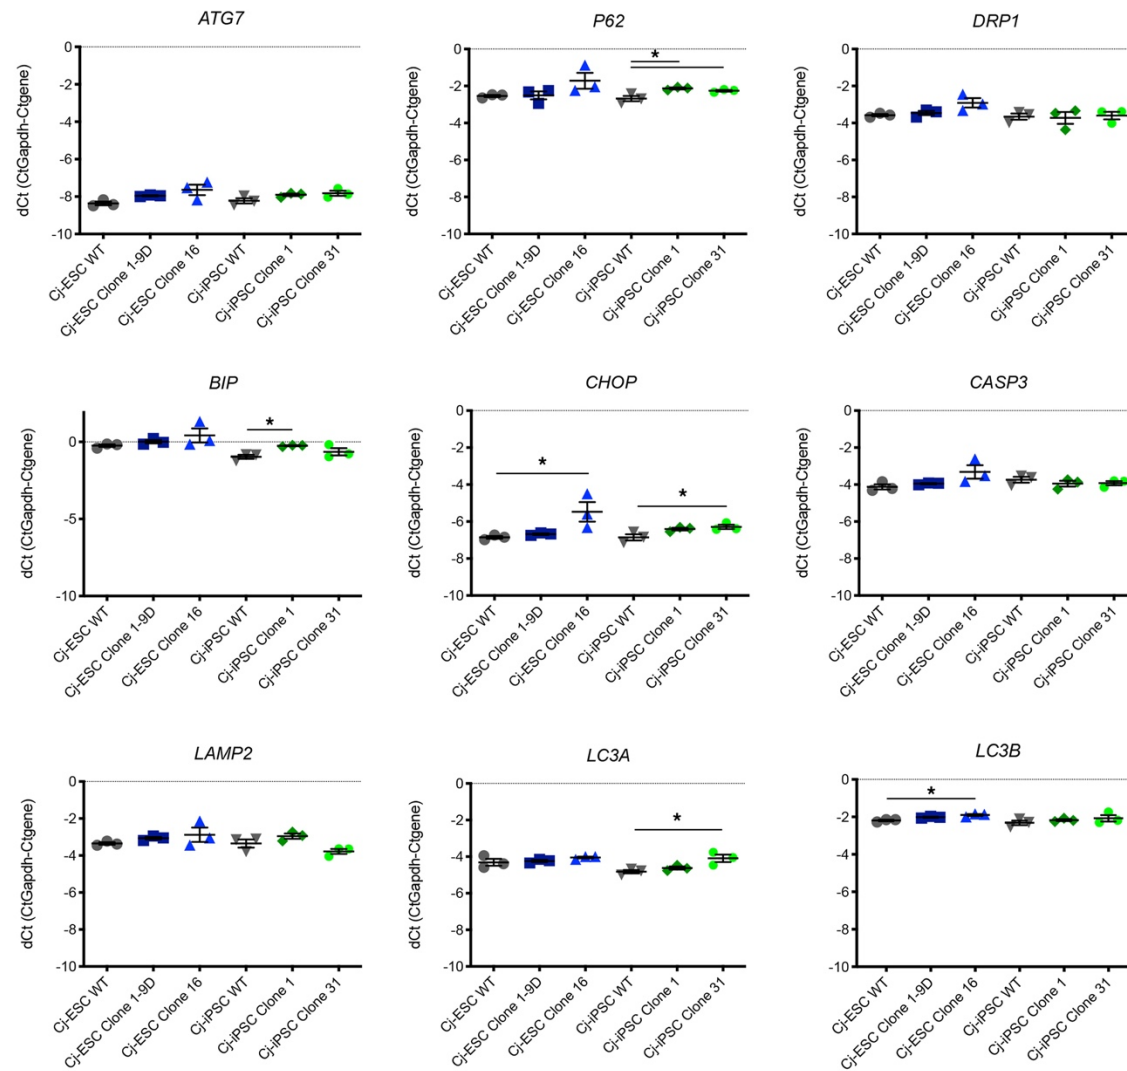

**Supplemental Figure 2: qRT-PCR for autophagy, ER stress, apoptotic, and mitochondrial related mRNAs.** Expression of *ATG7*, *P62*, *DRP1*, *BiP*, *CHOP*, *CASP3*, *LAMP2*, *LC3A*, and *LC3B* from samples collected on d67 of dopaminergic differentiation. (One-way ANOVA with Tukey's multiple comparison was used to compare among Cj-ESC or Cj-iPSC lines;  $p < 0.05^*$ )

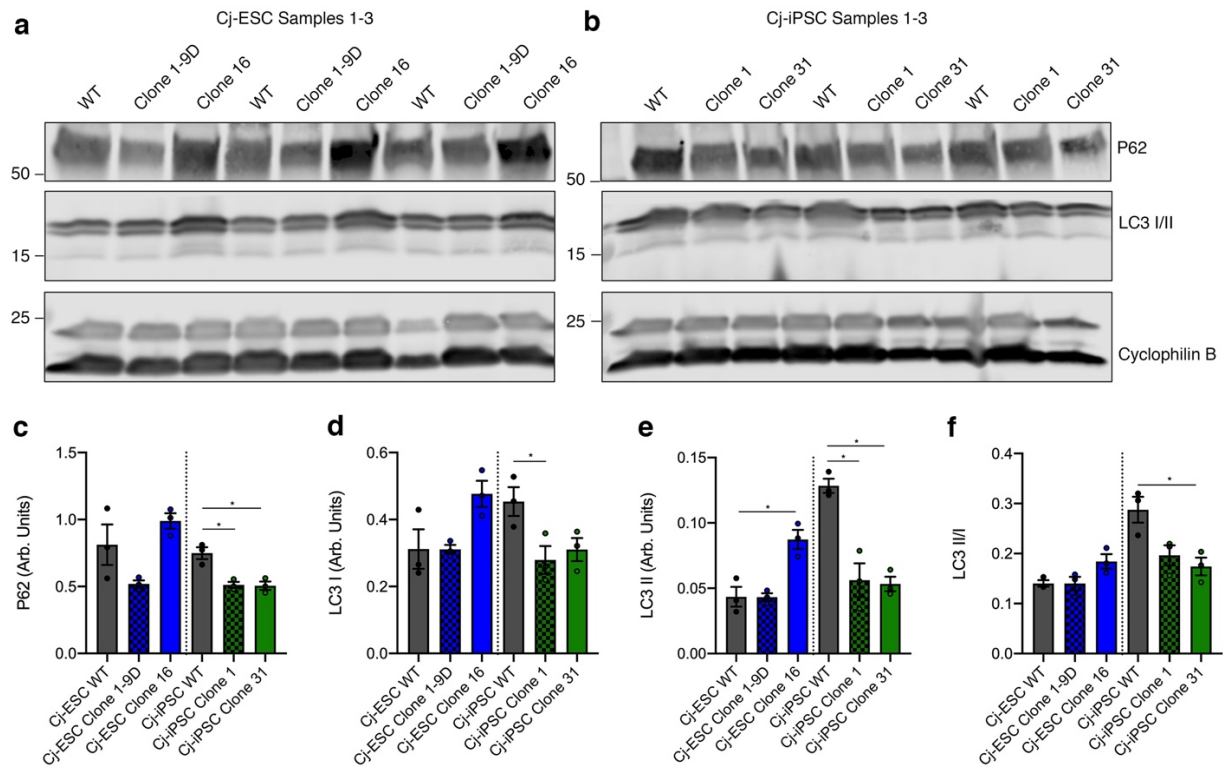

**Supplemental Figure 3: Western blot for autophagy-related proteins. (a & b)** Blot for P62, LC3I-II, with Cyclophilin B as the loading control. **(c)** Quantification of P62, **(d)** LC3I, **(e)** LC3II, and **(f)** LC3II/LC3I for Cj-ESC and Cj-iPSCs. (One-way ANOVA with Tukey's multiple comparison was used to compare among Cj-ESC or Cj-iPSC lines;  $p < 0.05^*$ ; Arbitrary units (Arb. units))

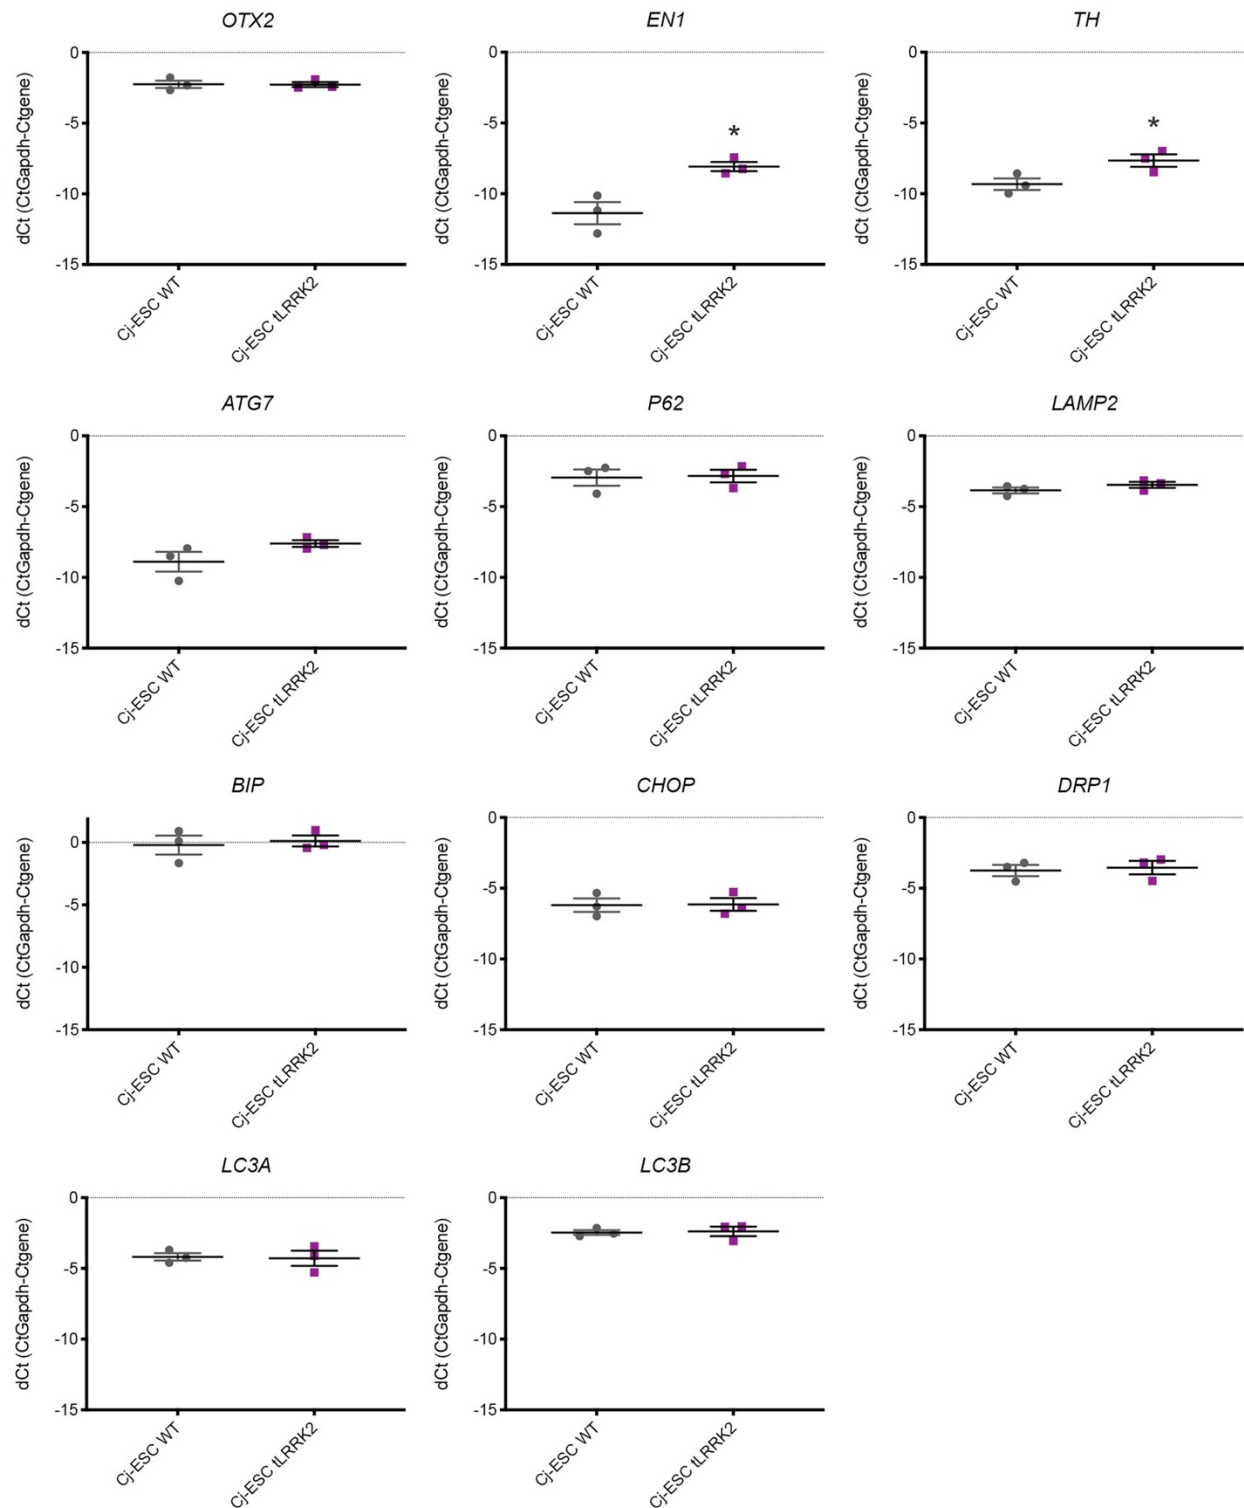

**Supplemental Figure 4: Evaluation of midbrain dopaminergic identity and autophagy/ER stress related genes.** Gene expression by qRT-PCR to evaluate dopaminergic patterning and differentiation, as well as autophagy and ER stress related genes. Student t-tests were used for statistical analysis.

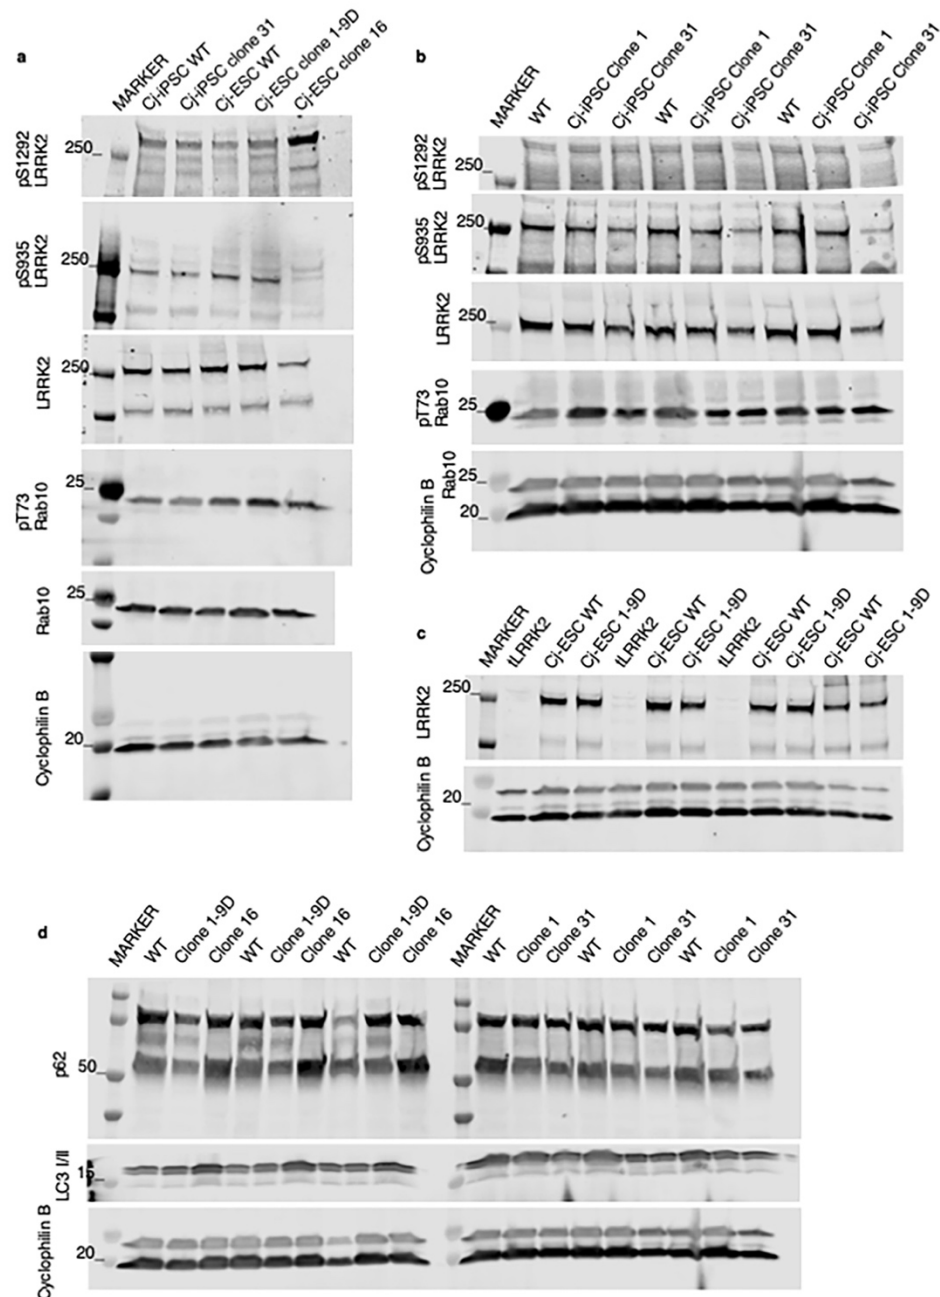

**Supplemental Figure 5: Uncropped blots of figures 3, 6 and supplementary figure 3 with molecular weight markers. (a,b)** Uncropped blots of figure 3a,b; Western Blots for pS1292 LRRK2 autophosphorylation, pS935 LRRK2, LRRK2, pT73 Rab10, Rab10, and cyclophilin B for Cj-ESC wild type (WT), Cj-ESC Clone 1-9D, and Cj-ESC Clone 16, and **(b)** Cj-iPSC WT, Cj-iPSC Clone 1, and Cj-iPSC Clone 31. **(c)** Uncropped blot of figure 6f; Western blot for LRRK2 using a C-terminal antibody shows the loss of LRRK2 detection in Cj-ESC tLRRK2 neurons. **(d)** Uncropped blot of supplementary figure 3a,b; Western blot for P62, LC3I-II, with Cyclophilin B as the loading control.

| Potential off-target sites        | Gene     | Input sequence:<br>ATTGCAAAGATTGCTGACTANGG | Off-target mutation |                    |                    |                     |
|-----------------------------------|----------|--------------------------------------------|---------------------|--------------------|--------------------|---------------------|
|                                   |          |                                            | Cj-ESC<br>Clone 1-9 | Cj-ESC<br>Clone 16 | Cj-iPSC<br>Clone 1 | Cj-iPSC<br>Clone 31 |
| Chr 1:<br>111645639-<br>111645661 | Unknown  | ATTGCTAAGATTGCTGCTTATGG                    | No                  | No                 | No                 | No                  |
| Chr1:<br>162034774-<br>162034796  | Unknown  | ATTGGAAATATTGCTGACTCAGG                    | No                  | No                 | No                 | No                  |
| Chr2:<br>112903883-<br>112903905  | Unknown  | ATTACCAAGCTTGCTGACTAAGG                    | No                  | No                 | No                 | No                  |
| Chr2:<br>113693146-<br>113693168  | Unknown* | ATTGCAAAGTTTCTGAATATGG                     | No                  | No                 | No                 | No                  |
| Chr2:<br>4024878-<br>4024900      | Unknown  | ATTTGAAAGATTGCTGCCTAGGG                    | No                  | No                 | No                 | No                  |
| Chr2:<br>85087588-<br>85087610    | Unknown  | ATTGCAATGAGTGCTGACAAAGG                    | No                  | No                 | No                 | No                  |
| Chr3:<br>121493937-<br>121493959  | Unknown  | ATTGCCAAGATTGTGGACTAAGG                    | No                  | No                 | No                 | No                  |
| Chr5:<br>71505305-<br>71505327    | Unknown  | ATTCAAGGATTCTGACTAAGG                      | No                  | No                 | No                 | No                  |

**Supplemental Table 1: CRISPR gRNA potential off-target sequence analysis.** Two separate g.G6055A clones from Cj-ESCs and Cj-iPSCs were isolated and homogeneity was verified through next-generation sequencing. The top eight predicted off-target sites were evaluated for INDEL formation. None of the sequences are within annotated genes in the marmoset or human, except for one region on human chromosome 2 which was predicted as part of the transcript variant for METTL22 and SLC25A53 in the human (indicated with \*).

| Potential off-target site         | Gene    | Input sequence<br>GCTCAGTACTGCTGTAGAAT <u>NGG</u> | Off-target mutation<br>Cj-ESC<br>tLRRK2 |
|-----------------------------------|---------|---------------------------------------------------|-----------------------------------------|
| Chr2:<br>143675482-<br>143675460  | Unknown | GCTAAATTCTGCTGTAGAATT <u>GG</u>                   | No                                      |
| Chr9:<br>84780276-<br>84780298    | Unknown | GCTCAGTACTGCTGTAATAC <u>AGG</u>                   | No                                      |
| Chr10:<br>45159485-<br>45159463   | Unknown | GCTCAGCAATGCTGTAGATT <u>AGG</u>                   | No                                      |
| Chr11:<br>122658242-<br>122658220 | Unknown | GCTAAGTTCTGCTGTAGAATT <u>AGG</u>                  | No                                      |
| Chr15:<br>39184321-<br>39184343   | Unknown | CCTCTGTACTGCTGTAGAAG <u>AGG</u>                   | No                                      |
| Chr16:<br>61184568<br>61184546    | Unknown | GCTCAGTACTGCTGGAGGCT <u>GGG</u>                   | No                                      |
| Chr20:<br>4367998<br>4368020      | Unknown | GCTCAGCACTGCTGTAAAT <u>GGG</u>                    | No                                      |
| Chr22:<br>49084681<br>49084659    | Unknown | GCTCAGTACTGCTGCAGCAC <u>CGG</u>                   | No                                      |

**Supplemental Table 2: CRISPR tLRRK2 gRNA off-target sequence analysis.** The top eight potential off-target sites were evaluated for INDEL formation.

**Supplemental Table 3: qRT-PCR and DNA sequencing primer pairs**

| <i>Differentiation</i>                           |      |                        | <i>LRRK2 G2019S Off-Target</i> |      |                        |
|--------------------------------------------------|------|------------------------|--------------------------------|------|------------------------|
| Gene                                             | Pair | 5'-Sequence-3'         | Chromosome                     | Pair | 5'-Sequence-3'         |
| NANOG                                            | Fwd  | GATGTGACTCAGAAGGCCTCA  | Chr1-1                         | Fwd  | GTAACAAGGCACCAACCACAAG |
|                                                  | Rev  | CCATACCGGAAGGTTCCAG    |                                | Rev  | CCAGGCTCTCAGCTAAGCATT  |
| NEUROD1                                          | Fwd  | CTGTCACCGCTCAGGACCTA   | Chr1-2                         | Fwd  | GGTGCTTGTATGACCTGGTGC  |
|                                                  | Rev  | GTCCAGCTTGGAGGACCTTG   |                                | Rev  | TCAAAGAGCAAGTACCCGAGAC |
| OTX2                                             | Fwd  | CGAGAAGGATGTGGTCCGTG   | Chr2-1                         | Fwd  | ATGCAAGGCTCCTACTTTCTGG |
|                                                  | Rev  | ACACTGGTCCCCCTGAGAAA   |                                | Rev  | CTTTGGTTGCCAAGATGACAGG |
| EN1                                              | Fwd  | GATCGTCCATCCTCCGGTCC   | Chr2-2                         | Fwd  | TGAATCCTGGCAAGGCAAGTG  |
|                                                  | Rev  | CGATAGCACCTGTCCGAGTC   |                                | Rev  | CAAGAATTAGCCAGGCATGGTG |
| TH                                               | Fwd  | CTTGCACTCCCTGTCTGAGG   | Chr2-3                         | Fwd  | TCTTCTTTCCACTTCCCTGGTC |
|                                                  | Rev  | TGTCTGGTCTTGGTAGGGCT   |                                | Rev  | GCAAGAAACCATTTCCACAGAG |
| <i>Autophagy-related Gene</i>                    |      |                        | Chr2-4                         | Fwd  | TGCTAGGTAGGCTTTGACATGG |
| Gene                                             | Pair | 5'-Sequence-3'         |                                | Rev  | GGCAACTGCTGGCTAATGAAG  |
| ATG7                                             | Fwd  | CCGGAAGTTGAGTGTGGATT   | Chr3                           | Fwd  | ATGACCAAGGGCTGTGTGC    |
|                                                  | Rev  | TCCTCTGTAGTTGCTGCCAT   |                                | Rev  | TGGCAACAGAGCAAGACTCC   |
| P62                                              | Fwd  | ACCCTGAGGAACAGATGGAATC | Chr5                           | Fwd  | GACCCTGCCCTGGACAAATG   |
|                                                  | Rev  | TCCAAAGAGCTTGGCCCTTC   |                                | Rev  | TGAGGAGTTAGGCCACCAGG   |
| LAMP2                                            | Fwd  | TCATGTTGTGCTTCCGCCTC   | Chr10                          | Fwd  | TCCGAGGGACTCAAACAGC    |
|                                                  | Rev  | TAAGACCGCAAGGCTCCAG    |                                | Rev  | GCTCTGGTTCTTCTCTGCTGTC |
| LC3A                                             | Fwd  | CGTAGTCAGAGGGCACCAAC   | <i>tLRRK2 Off-Target</i>       |      |                        |
|                                                  | Rev  | GATGAACCACACAGCAGGAGT  | Chromosome                     | Pair | 5'-Sequence-3'         |
| LC3B                                             | Fwd  | GCACCTTCGAACAAAGAGTAGA | Chr2                           | Fwd  | AGCATAGCACATGGACAGTCTC |
|                                                  | Rev  | GCTTCTCACCTTGTATCGTTC  |                                | Rev  | TTGCATTTCCCTGACTGGTGAG |
| <i>ER/Apoptosis/Mitochondria &amp; Reference</i> |      |                        | Chr9                           | Fwd  | AGGCTGAGGCAAGAGAATCG   |
| Gene                                             | Pair | 5'-Sequence-3'         |                                | Rev  | CCTTCTCTGCTGTGTCTCTGTG |
| BIP                                              | Fwd  | TCCCGAGAACACGGTCTTTG   | Chr10                          | Fwd  | AGGGTGACTCTCAGGAACTGG  |
|                                                  | Rev  | TTCAACCACCTTGAACGGCA   |                                | Rev  | TCCTTTGAGTTAAGCTGGCTGC |
| CHOP                                             | Fwd  | CGATCCCTAGGTCAGAGGCT   | Chr11                          | Fwd  | AGCTAAGGAAGAAGGAAGCAGG |
|                                                  | Rev  | CCTCCTTGAACACTCTCTCCTC |                                | Rev  | TTCTCGACCAGACGGTAGGTG  |
| CASP3                                            | Fwd  | ACCAATGGACCTGTTGACCTG  | Chr15                          | Fwd  | AAGAGGTGTTCTCCACAGC    |
|                                                  | Rev  | CCACGGCAGGCCGTAATAAT   |                                | Rev  | GGTACAGTTTGGGCCATTGC   |
| DRP1                                             | Fwd  | CAGCAATGGAGGCGCTAATTC  | Chr16                          | Fwd  | AGCCTCAGCTCCTTACTTGC   |
|                                                  | Rev  | TCTTTCCACTGCTCTGCGTTC  |                                | Rev  | AAATGCACCAAGCAGCCAC    |
| GAPDH                                            | Fwd  | TCGGAGTCAACGGATTTGGT   | Chr20                          | Fwd  | TGCTTGTCTCTTGTCCCTGTC  |
|                                                  | Rev  | ATGGCGACGACATCCACTTT   |                                | Rev  | TCAGACTGGCCTTGAAGTCC   |
| <i>LRRK2 g.6055 Region Sequencing Primers</i>    |      |                        | Chr22                          | Fwd  | GGTTTCTCGCCCGTGTGTAC   |
| Method                                           | Pair | 5'-Sequence-3'         |                                | Rev  | ACCATTTCGTGTGCAGTGAGTG |
| Sanger                                           | Fwd  | GGGTCAAAGTGAGCACAG     |                                |      |                        |
|                                                  | Rev  | GTGGACCTGAATTTGACTCACC |                                |      |                        |
| NGS                                              | Fwd  | CCTGTGGAATTTCTGGCAG    |                                |      |                        |
|                                                  | Rev  | CTTCTGACTCTTCTGAACTC   |                                |      |                        |

**Supplemental Table 4: List of primary antibodies**

| <b>Antibody</b>              | <b>Species</b>        | <b>Company</b>                    | <b>Dilution</b> | <b>Application</b> |
|------------------------------|-----------------------|-----------------------------------|-----------------|--------------------|
| pS1292 LRRK2<br>(MJF-19-7-8) | Rabbit;<br>monoclonal | Abcam (ab203181)                  | 1:2000          | WB                 |
| LRRK2<br>(MJFF2)             | Rabbit;<br>monoclonal | Abcam (ab133474)                  | 1:2000          | WB                 |
| pS935 LRRK2<br>[UDD2 10(12)] | Rabbit;<br>monoclonal | Abcam (ab133450)                  | 1:2000          | WB                 |
| Cyclophilin B                | Rabbit;<br>polyclonal | Abcam (ab16045)                   | 1:2000          | WB                 |
| pT73 Rab10<br>(MJF-R21)      | Rabbit;<br>monoclonal | Abcam (ab230261)                  | 1:2000          | WB                 |
| Rab10<br>(MJF-R23)           | Rabbit;<br>monoclonal | Abcam (ab237703)                  | 1:2000          | WB                 |
| LC3B                         | Rabbit;<br>polyclonal | Novus Biologicals<br>(NB100-2220) | 1:2000          | WB                 |
| SQSTM1/ p62                  | Mouse;<br>monoclonal  | Abcam (ab56416)                   | 1:2000          | WB                 |
| βIII-Tubulin                 | Mouse;<br>monoclonal  | R&D (MAB1195)                     | 0.5 µg/mL       | ICC                |
| MAP2                         | Rabbit;<br>polyclonal | Millipore<br>(AB5622)             | 1:500           | ICC                |
| TH                           | Mouse;<br>monoclonal  | Immunostar<br>(22941)             | 1:500           | ICC                |
| FOXA2/HNF-3β                 | Mouse;<br>monoclonal  | Santa Cruz<br>(sc-374376)         | 0.5 µg/mL       | ICC                |
| PAX6                         | Mouse;<br>monoclonal  | DSHB<br>(PAX6)                    | 15 µl/mL        | ICC                |
